# Supplementary material for: Molecular porphyrinic freestanding buckypaper electrodes from carbon nanotubes for glucose fuel cells
Source: Royal Society of Chemistry journal article supplement (doi:10.1039/c7ta01525a), 2017-01-01
Supplement: c7ta01525a1.pdf [file c7ta01525a1.pdf]

## **Supporting information for:**

### **Molecular porphyrinic freestanding buckypaper electrodes from carbon nanotubes for glucose fuel cells**

Kamal Elouarzaki,<sup>¥,#</sup> Adrian C. Fisher,<sup>¥,≠</sup> and Jong-Min Lee<sup>¥,#</sup>

¥ *Cambridge CARES, CREATE Tower, 1 CREATE Way, Singapore 138602, Singapore*

# *School of Chemical and Biomedical Engineering, Nanyang Technological University, 62 Nanyang Drive, Singapore 637459, Singapore*

≠ *Department of Chemical Engineering and Biotechnology, University of Cambridge, New Museums Site, Pembroke Street, Cambridge, CB2 3RA, United Kingdom*

#### **1. Materials and Instrumentation:**

Chemicals used in this work were purchased from Sigma-Aldrich and used as received unless mentioned otherwise.

The morphology was observed using scanning electron microscopy SEM (JEOL, JSM-6700F, 5 kV) and TEM (JEOL, JEM-2010, 200 kV). Nuclear magnetic resonance (NMR) spectroscopy was carried out with Bruker Avance 400 NMR spectrometer operating at 400.0 MHz. ESI mass spectra were recorded with a Bruker APEX-Qe ESI FT-ICR mass spectrometer. Brunauer–Emmett–Teller (BET) specific surface area of samples was measured at 77 K with a Micromeritics ASAP 2020 HD88 system. The electric resistance was measured by a DC voltage/current four-point probe method using a Jandel (RM3). UV-vis spectra were measured using a UV-1500 PC photodiode array spectrophotometer equipped with a quartz cell (light path = 1 cm). All Electrochemical measurements were performed at room temperature with an Autolab electrochemical analyzer (Eco Chemie, Utrecht, and The Netherlands)

#### **2. Synthesis:**

the synthesis and characterization of Co(TCPP)pyr<sub>4</sub> have been previously described.<sup>[15]</sup> The synthesis of Rh(TCPP)pyr<sub>4</sub> was performed by slightly modifications of established literature reported method<sup>[15]</sup> using the following procedure: Meso-tetrakis-(4-carboxyphenyl) porphyrin (100 mg, 0.125 mmol) was dissolved in 10 ml of anhydrous methylene chloride. 1.5 ml of a 2 M solution of oxalyl chloride in methylene chloride (3 mmol) and a catalytic amount of DMF (1 μl) was added. The mixture was stirred overnight under nitrogen. After concentrating the solution in a stream of dry nitrogen then under high vacuum, the crude acid chloride was redissolved in 10 ml of dry DMF. A solution of the pyrenemethylamine (227.7 mg, 1 mmol, 8 equivalents) and 500 μl of triethylamine in 5ml of dry DMF were added. The resulting mixture was stirred under nitrogen overnight. The solution was concentrated and respectively washed with 10% citric acid, 1N NaOH, and dichloromethane (50 mL). The crude product was dissolved again in 50 ml of dry DMF and Rh<sub>2</sub>Cl<sub>2</sub>(CO)<sub>4</sub> (15.0 mg) was added, stirred and refluxed for 7 h. After evaporation of the solvent, column chromatography was eluted with dichloromethane then dichloromethane/ethanol (15:1) to afford the desired Rh(TCPP)pyr<sub>4</sub> complex (29 mg).

<sup>1</sup>H NMR (400 MHz, DMSO-d<sub>6</sub>, δ): 9.78 (s, 4H), 8.91 (s, 8H), 8.59-7.86 (m, 44H), 7.66 (d, 4H), 7.58 (d, 4H), 5.44 (d, 8H).

MS (ESI) (DMSO) m/z: [Rh(TCPP)pyr<sub>4</sub>]<sup>+</sup> calcd for C<sub>116</sub>H<sub>80</sub>N<sub>8</sub>O<sub>4</sub>Rh, 1752.5; found, 1752.9.

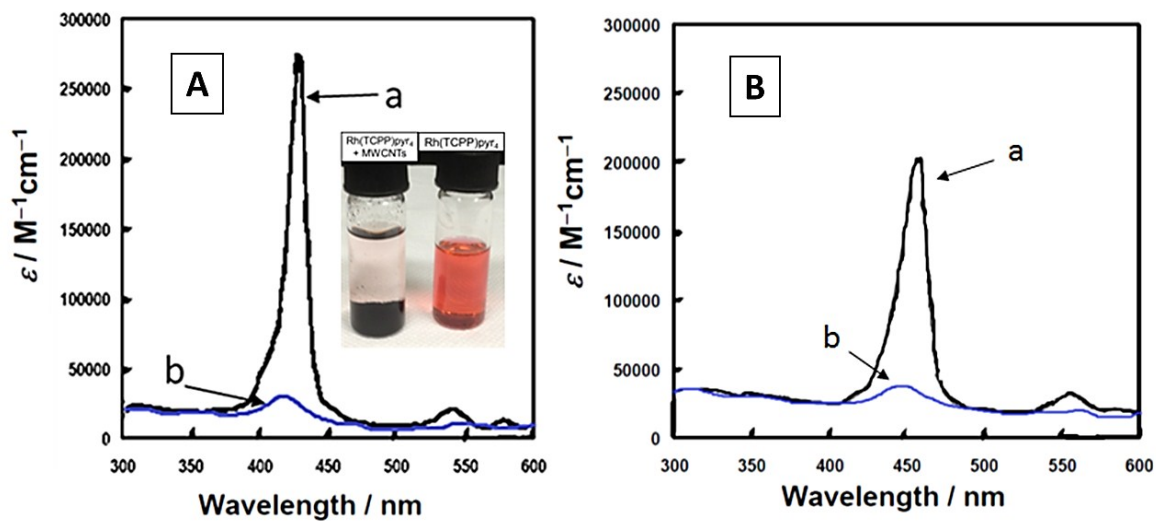

Figure S1. UV spectra of A: Rh(TCPP)pyr<sub>4</sub> a) solution before filtration b) outflow collection solution (Inset before and after adding MWCNT to an initial solution of Rh(TCPP)pyr<sub>4</sub>) . B) Co(TCPP)pyr<sub>4</sub> a) solution before filtration b) outflow collection solution. The measurements were performed in DMF.
